# Supplementary material for: Understanding PM2.5 Risk Perception in Urban Thailand: Associations with Influencing Factors
Source: Research Square preprint supplement (doi:10.21203/rs.3.rs-6777766/v1), 2025-06-18

## Understanding PM2.5 Risk Perception in Urban Thailand: Associations with Influencing Factors

### Additional file 1

The Institutional Review Board of the Faculty of Medicine Vajira Hospital is in full compliance with the international guidelines for human research protection as Declaration of Helsinki, The Belmont Report, CIOMS Guideline and International Conference on Harmonization in Good Clinical Practice (ICH-GCP).

|                                                                                                                                                                                                                                                                                                                           |                                                                                                                                                                                                                                                                                                                                                                        |                                                                                                                                                                                         |  |              |
|---------------------------------------------------------------------------------------------------------------------------------------------------------------------------------------------------------------------------------------------------------------------------------------------------------------------------|------------------------------------------------------------------------------------------------------------------------------------------------------------------------------------------------------------------------------------------------------------------------------------------------------------------------------------------------------------------------|-----------------------------------------------------------------------------------------------------------------------------------------------------------------------------------------|--|--------------|
| 681 SAMSEN ROAD, DUSIT, BANGKOK 10300<br>Tel. 0-2244-3843                                                                                                                                                                                                                                                                 |                                                                                                                                                                                                                                                                                                                                                                        |                                                                                                        |  | COA 057/2567 |
| <b>INSTITUTIONAL REVIEW BOARD</b><br><b>FACULTY OF MEDICINE VAJIRA HOSPITAL</b><br><b>CERTIFICATE OF APPROVAL</b>                                                                                                                                                                                                         |                                                                                                                                                                                                                                                                                                                                                                        |                                                                                                                                                                                         |  |              |
| <p>The Institutional Review Board of the Faculty of Medicine Vajira Hospital, is in full compliance with the international guidelines for human research protection as Declaration of Helsinki, The Belmont Report, CIOMS Guideline and International Conference on Harmonization in Good Clinical Practice (ICH-GCP)</p> |                                                                                                                                                                                                                                                                                                                                                                        |                                                                                                                                                                                         |  |              |
| <b>PROTOCOL TITLE</b>                                                                                                                                                                                                                                                                                                     | Public Perception of Particulate Matter 2.5 (PM2.5) and Anxiety: A Cross-sectional Study in Bangkok and Chiang Mai, Thailand<br>การรับรู้เกี่ยวกับฝุ่นละอองขนาดเล็กและความวิตกกังวลของประชาชน: การศึกษานานาชาติขวางในกรุงเทพมหานครและเชียงใหม่ ประเทศไทย                                                                                                               |                                                                                                                                                                                         |  |              |
| <b>STUDY CODE</b>                                                                                                                                                                                                                                                                                                         | 014/67 E                                                                                                                                                                                                                                                                                                                                                               |                                                                                                                                                                                         |  |              |
| <b>PRINCIPAL INVESTIGATOR</b>                                                                                                                                                                                                                                                                                             | Dr. Titaporn Luangwilai                                                                                                                                                                                                                                                                                                                                                |                                                                                                                                                                                         |  |              |
| <b>AFFILIATION</b>                                                                                                                                                                                                                                                                                                        | Department of Research and Medical Innovation, Faculty of Medicine Vajira Hospital, Navamindradhiraj University                                                                                                                                                                                                                                                        |                                                                                                                                                                                         |  |              |
| <b>DOCUMENT REVIEWED</b>                                                                                                                                                                                                                                                                                                  | <ol style="list-style-type: none"> <li>Research Protocol version 2 date 21 March 2024</li> <li>Information sheet version 2 date 21 March 2024</li> <li>Consent form version 2 date 21 March 2024</li> <li>Case Record Form version 2 date 21 March 2024</li> <li>Investigator's CV and ICH-GCP Training Certificate and Declaration of Conflict of Interest</li> </ol> |                                                                                                                                                                                         |  |              |
| <b>5.1 Investigator's</b>                                                                                                                                                                                                                                                                                                 | 1) Dr. Titaporn Luangwilai                                                                                                                                                                                                                                                                                                                                             |                                                                                                                                                                                         |  |              |
| <b>5.2 Co-Investigator's</b>                                                                                                                                                                                                                                                                                              | <ol style="list-style-type: none"> <li>Asst. Prof. Dr.Jadsada Kunno</li> <li>Dr. Parichat Ong-Artborirak</li> <li>Basmon Manomaipiboon, MD, MSc</li> <li>Witchakorn Ruamtawee</li> </ol>                                                                                                                                                                               |                                                                                                                                                                                         |  |              |
|                                                                                                                                                                                                                                                                                                                           |                                                                                                                                                                                                                                                                                                                                                                        | Signature <br>(Professor Siriwan Tangjitgamol, MD)<br>Chairman<br>Vajira Institutional Review Board |  |              |
| <b>Initial Approval</b><br>Date of Approval 25/03/2024<br>Approval Expire Date 24/03/2025<br>Approval is granted subject to the following conditions: (see back of this Certificate)                                                                                                                                      |                                                                                                                                                                                                                                                                                                                                                                        |                                                                                                                                                                                         |  |              |
| Page   1/1                                                                                                                                                                                                                                                                                                                |                                                                                                                                                                                                                                                                                                                                                                        |                                                                                                                                                                                         |  |              |

**All approved investigators must comply with the following conditions:**

1. Strictly conduct the research as required by the protocol;
2. Use only the information sheet, consent form (and recruitment materials, if any) veering the Institutional Review Board's seal of approval; and return one copy of such documents of the first subject recruited to the Institutional Review Board (IRB) for the record;
3. Provide reports to the Institutional Review Board concerning the progress of the research upon the specified period of time or when requested; (...12....Months)
4. If the study cannot be finished within the expire date of the approval certificate, the investigator is obliged to reapply for approval at least one month before the date of expiration.

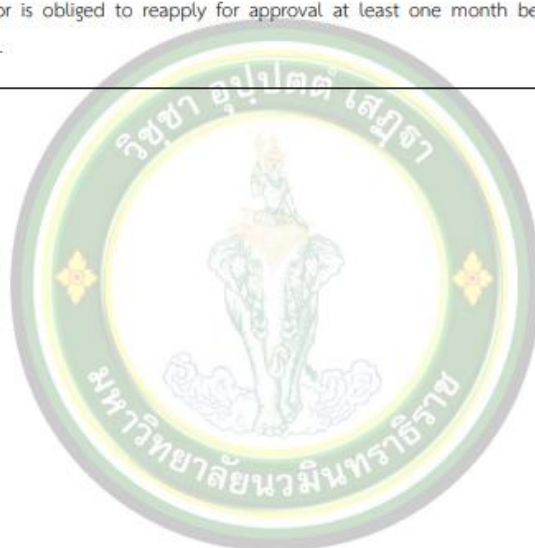

Supplement: Supplementary file 1 [file c362129842148b3211771440.pdf]
