# Supplementary material for: Understanding PM2.5 Risk Perception in Urban Thailand: Associations with Influencing Factors
Source: Research Square preprint supplement (doi:10.21203/rs.3.rs-6777766/v1), 2025-06-18
Supplement: Supplementary file 2 [file de530fe42838ea935363664c.pdf]

## Understanding PM2.5 Risk Perception in Urban Thailand: Associations with Influencing Factors

### Additional file 2

The full English language version of the questionnaire. The full English language version of the questionnaire

### 13-item scale to measure PM2.5 risk perception questionnaire (English version)

Consent from

( ) Allow

( ) Not allow

ID .....

### A 13-item scale to measure PM2.5 risk perception

| Risk perceptions of PM2.5 items   |                                                                                | Scales         |       |         |          |                   |
|-----------------------------------|--------------------------------------------------------------------------------|----------------|-------|---------|----------|-------------------|
|                                   |                                                                                | Strongly agree | Agree | Neutral | Disagree | Strongly disagree |
| Perceived susceptibility of PM2.5 |                                                                                |                |       |         |          |                   |
| 1                                 | Outdoor activities currently involve higher PM 2.5 exposure                    |                |       |         |          |                   |
| 2                                 | PM2.5 exposure is elevated during outdoor activities                           |                |       |         |          |                   |
| 3                                 | N95 masks significantly reduce PM2.5 exposure                                  |                |       |         |          |                   |
| 4                                 | PM2.5 exposure raises respiratory disease risk                                 |                |       |         |          |                   |
| 5                                 | PM2.5 exposure raises cardiovascular disease risk                              |                |       |         |          |                   |
| 6                                 | PM2.5 exposure raises lung disease risk                                        |                |       |         |          |                   |
| 7                                 | PM2.5 impacts mental health                                                    |                |       |         |          |                   |
| 8                                 | Higher PM2.5 risk for children, women, older adults, and lung disease patients |                |       |         |          |                   |
| Perceived severity of PM2.5       |                                                                                |                |       |         |          |                   |
| 9                                 | PM2.5 more damaging to health than general dust                                |                |       |         |          |                   |
| 10                                | PM2.5 impacts daily life                                                       |                |       |         |          |                   |
| 11                                | Outdoor activities with high PM2.5 can readily cause illness.                  |                |       |         |          |                   |
| 12                                | PM2.5 illnesses impact work disruption or stoppage                             |                |       |         |          |                   |
| 13                                | PM2.5 impacts the economy, including tourism.                                  |                |       |         |          |                   |

The responses were based on a five-point Likert scale, ranging from 1 (strongly disagree) to 5 (Strongly agree). The total scores were then categorized into five levels of perceived PM2.5 risk, with 4.51–5.00 indicating the highest level, 3.51–4.50 indicating a high level, 2.51–3.50 indicating a moderate level, 1.51–2.50 indicating a low level, and 1.00–1.50 indicating the lowest level.
